# Supplementary material for: Association between Smoking and Urine Indole Levels Measured by a Commercialized Test
Source: MDPI journal article supplement (doi:10.3390/metabo12030234), 2022-03-09
Supplement: s1 [file s1]

## Supplemental Material

| (No. of subjects)               | Non-Smoking<br>(94) | Past-Smoking<br>(108) | Current-Smoking<br>(71) | <i>P-Value</i> |
|---------------------------------|---------------------|-----------------------|-------------------------|----------------|
| Age (years)                     | 45 ± 7              | 47 ± 4*               | 44 ± 4                  | <b>0.002</b>   |
| BMI (kg/m <sup>2</sup> )        | 24 ± 2              | 24 ± 2                | 24 ± 2                  | 0.942          |
| Circumference of Chest (cm)     | 94 ± 6              | 95 ± 5                | 94 ± 5                  | 0.499          |
| Circumference of Abdomen (cm)   | 82 ± 6              | 84 ± 6                | 83 ± 6                  | 0.21           |
| Systolic Blood Pressure (mmHg)  | 118 ± 13            | 115 ± 10              | 117 ± 12                | 0.135          |
| Diastolic Blood Pressure (mmHg) | 75 ± 9              | 73 ± 7                | 74 ± 10                 | 0.276          |
| WBC (×10 <sup>3</sup> /μL)      | 4.66 ± 0.97         | 4.69 ± 1.22           | 5.01 ± 1.18             | 0.092          |
| RBC (×10 <sup>6</sup> /μL)      | 504 ± 33*           | 496 ± 35              | 486 ± 34                | <b>0.004</b>   |
| Hb (g/dL)                       | 15.2 ± 0.83†        | 14.9 ± 0.81           | 15.0 ± 0.77             | <b>0.033</b>   |
| PLT (/μL)                       | 22 ± 5              | 23 ± 5                | 23 ± 4                  | 0.724          |
| T-CHO (mg/dL)                   | 199.6 ± 31.0        | 196.0 ± 30.0          | 191.1 ± 31.7            | 0.202          |
| HDL-C (mg/dL)                   | 60.7 ± 14.5         | 58.7 ± 13.7           | 60.5 ± 13.1             | 0.161          |
| LDL-C (mg/dL)                   | 118.1 ± 27.5        | 114.5 ± 26.6          | 109.6 ± 30.5            | 0.531          |
| TG (mg/dL)                      | 69.5(49.8, 92.5) †  | 79.5(60.3, 110.8)     | 72.0(54.0, 95.0)        | <b>0.019</b>   |
| AST (IU/L)                      | 22.6 ± 5.3          | 25.4 ± 24.9           | 22.0 ± 5.3              | 0.303          |
| ALT (IU/L)                      | 21.7 ± 10.1         | 22.6 ± 13.2           | 20.8 ± 9.8              | 0.571          |
| γ-GTP (IU/L)                    | 33.1 ± 23.4         | 37.7 ± 29.1           | 36.1 ± 28.9             | 0.478          |
| BUN (mg/dL)                     | 15.0 ± 3.2          | 14.7 ± 3.4            | 14.0 ± 3.4              | 0.113          |
| Cr (mg/dL)                      | 0.98 ± 0.14         | 0.97 ± 0.11           | 0.97 ± 0.12             | 0.814          |
| UA (mg/dL)                      | 6.5 ± 1.3           | 6.4 ± 1.3             | 6.6 ± 1.4               | 0.828          |
| FBS (mg/dL)                     | 96.6 ± 7.6          | 98.9 ± 9.0            | 96.1 ± 9.6              | 0.065          |

|                                                  |                    |                  |                  |              |
|--------------------------------------------------|--------------------|------------------|------------------|--------------|
| IRI (μU/mL)                                      | 4.9 ± 2.0          | 5.1 ± 2.1        | 4.7 ± 1.9        | 0.317        |
| HOMA-IR                                          | 1.19 ± 0.55        | 1.27 ± 0.54      | 1.12 ± 0.51      | 0.227        |
| HOMA-beta                                        | 51.9 ± 17.4        | 53.3 ± 21.7      | 53.1 ± 23.5      | 0.833        |
| HbA1C (%)                                        | 5.68 ± 0.25        | 5.75 ± 0.33      | 5.67 ± 0.30      | 0.131        |
| CRP (mg/dL)                                      | 0.09(0.08, 0.12)   | 0.10(0.08, 0.12) | 0.09(0.08, 0.13) | 0.484        |
| <b><i>Previous history (Under treatment)</i></b> |                    |                  |                  |              |
| Hypertension, n (%)                              | 6 (6)              | 4 (4)            | 1 (1)            | 0.267        |
| Hyperlipidemia, n (%)                            | 5 (5)              | 5 (5)            | 0                | 0.156        |
| Hyperuricemia, n (%)                             | 12 (13)            | 9 (8)            | 3 (4)            | 0.155        |
| Metabolic Syndrome, n (%)                        | 2 (2)              | 6 (6)            | 4 (6)            | 0.416        |
| NAFLD, n (%)                                     | 23 (25)            | 27 (25)          | 13 (18)          | 0.539        |
| Alcohol intake (g/day)                           | 0.91(0.40, 2.00) * | 1.29(0.80, 2.37) | 1.37(0.57, 2.74) | <b>0.045</b> |

**Table S1.** Background characteristics of the subjects divided by smoking status

BMI, body mass index; WBC, white blood cells; RBC, red blood cells; Hb, hemoglobin; PLT, platelets; LDL, low density lipoprotein; TG, triglyceride; HDL, high density lipoprotein; AST, aspartate aminotransferase; ALT, alanine aminotransferase; γ-GTP, γ-glutamyltransferase; BUN, blood urea nitrogen; Cr, creatinine kinase; UA, uric acid; FBS, fasting blood sugar; IRI, immunoreactive insulin; HOMA, homeostasis model assessment; IR, insulin resistance; HbA1C, hemoglobin A1C; CRP, C-reactive protein; NAFLD, non-alcoholic fatty liver disease.

\*; P<0.05 vs. current-smoker, †; P<0.05 vs. past-smoke.

Bold values show p < 0.05.

| <b>n = 273</b>                                  | <b>β</b> | <b>P-Value</b> |
|-------------------------------------------------|----------|----------------|
| Circumference of Chest (cm)                     | 0.033    | 0.584          |
| Circumference of Abdomen (cm)                   | -0.009   | 0.879          |
| Systolic Blood Pressure (mmHg)                  | 0.071    | 0.243          |
| Diastolic Blood Pressure (mmHg)                 | 0.074    | 0.224          |
| WBC ( $\times 10^3/\mu\text{L}$ )               | 0.000    | 0.999          |
| RBC ( $\times 10^6/\mu\text{L}$ )               | 0.017    | 0.780          |
| Hb (g/dL)                                       | 0.024    | 0.688          |
| PLT ( $/\mu\text{L}$ )                          | -0.004   | 0.948          |
| T-CHO (mg/dL)                                   | -0.068   | 0.262          |
| HDL-C (mg/dL)                                   | 0.017    | 0.776          |
| LDL-C (mg/dL)                                   | -0.044   | 0.466          |
| AST (IU/L)                                      | -0.093   | 0.125          |
| FBS (mg/dL)                                     | 0.003    | 0.959          |
| HOMA-IR                                         | 0.017    | 0.781          |
| HOMA-beta                                       | 0.025    | 0.684          |
| HbA1C (%)                                       | -0.086   | 0.158          |
| CRP (mg/dL)                                     | -0.077   | 0.203          |
| <b><i>Previous history(Under treatment)</i></b> |          |                |
| Hyperuricemia, yes 1, no 0                      | 0.014    | 0.816          |
| Metabolic Syndrome, yes 1, no 0                 | 0.021    | 0.734          |

**Table S2.** Univariate regression analysis for urine indole levels.

The factors are ones which were not included in Table 2.

Abbreviation as Table S1.
